# Supplementary material for: Micropatterned model membrane with quantitatively controlled separation of lipid phases
Source: Royal Society of Chemistry journal article supplement (doi:10.1039/c4ra09981h), 2014-11-25
Supplement: c4ra09981h1.pdf [file c4ra09981h1.pdf]

## Supporting Information

### **Micropatterned model membrane with quantitatively controlled separation of lipid phases**

Fumiko Okada <sup>1</sup>, Kenichi Morigaki <sup>1,2\*</sup>

1: Graduate School of Agricultural Science, Kobe University, Rokkodaicho 1-1, Nada,  
Kobe 657-8501 Japan

2: Research Center for Environmental Genomics, Kobe University, Rokkodaicho 1-1,  
Nada, Kobe 657-8501 Japan

\*Corresponding author:

Kenichi Morigaki: E-mail: [morigaki@port.kobe-u.ac.jp](mailto:morigaki@port.kobe-u.ac.jp), Fax: +81-78-803-5941

## 1. Observation of the phase separation process:

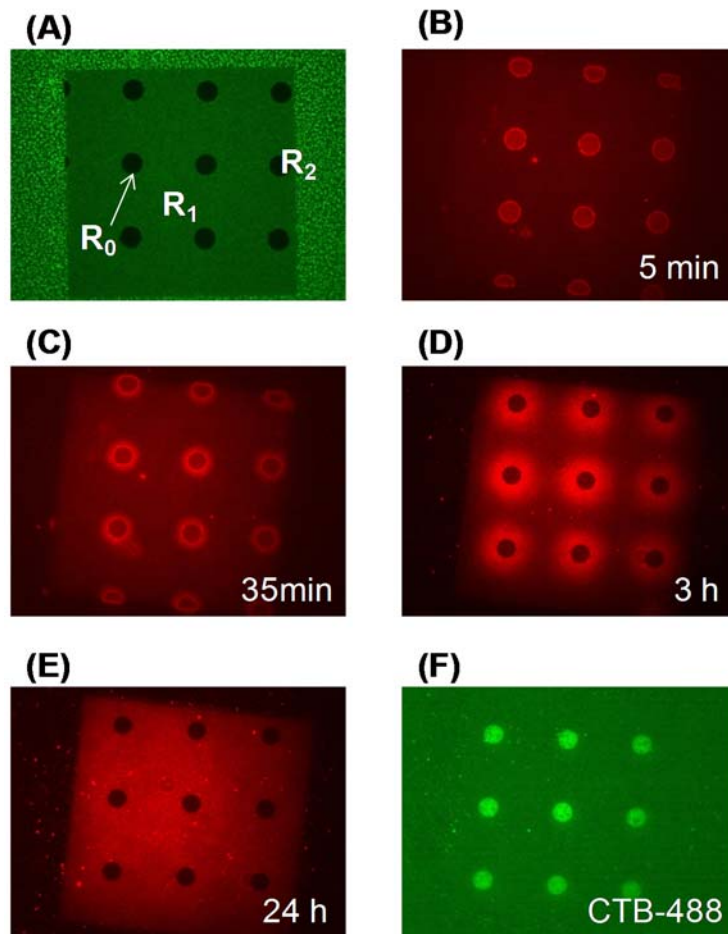

Figure S1: The phase separation process was observed by the total internal reflection fluorescence microscopy (TIR-FM). (A) Fluorescence of polymerized DiynePC (epi-fluorescence). R<sub>0</sub>, R<sub>1</sub>, and R<sub>2</sub> are polymer-free region, partially polymeric region, fully polymeric region, respectively. (B)-(E) TIR-FM observation of TR-PE after the introduction of DOPC/ SM/ Chol/ TR-PE/ G<sub>M1</sub>. The elapsed time after the introduction of lipid membrane is shown. (F) The accumulation of L<sub>0</sub> phase in R<sub>0</sub> was confirmed with CTB-488.

## 2. Parameters for controlling the phase separation:

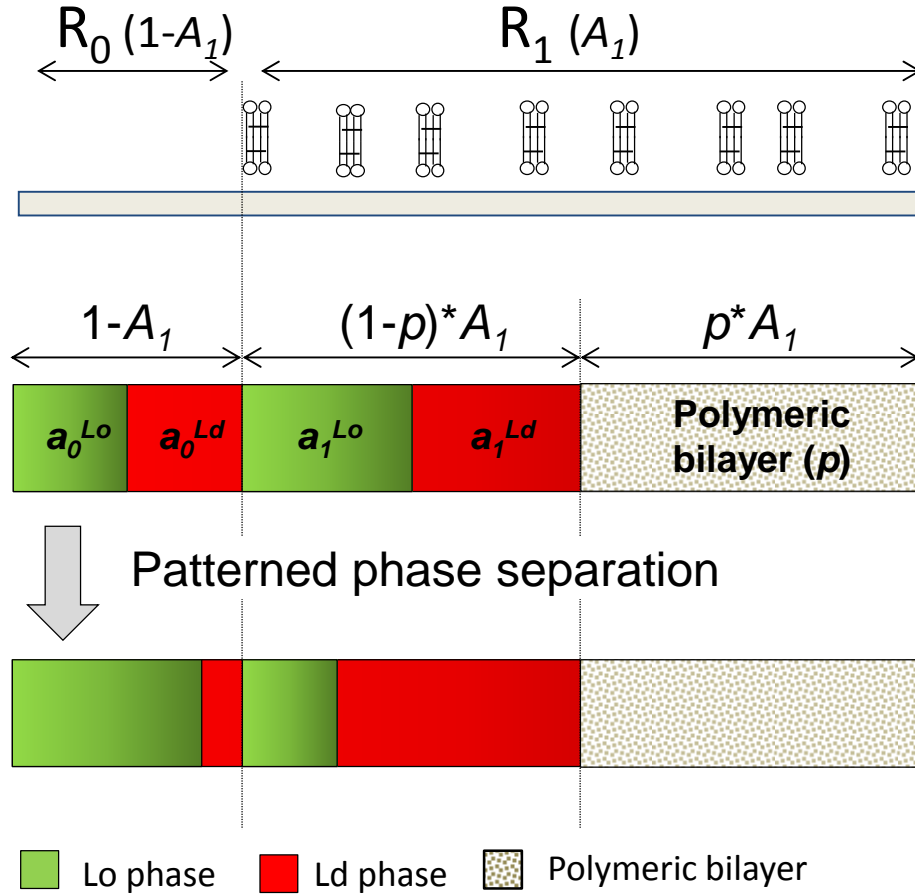

Figure S2: Schematic representation of  $L_0/L_d$  distributions in the patterned membrane. Fluid bilayer is incorporated into the polymer-free region ( $R_0$ ) and partially polymeric region ( $R_1$ ). The area fraction of  $R_1$  is designated as  $A_1$ . The coverage of polymeric bilayer in  $R_1$  is designated as  $p$ . The area fractions of  $L_0$  and  $L_d$  phases in  $R_0$  and  $R_1$  are designated as  $a_0^{L_0}$ ,  $a_0^{L_d}$ ,  $a_1^{L_0}$ , and  $a_1^{L_d}$ , respectively ( $a_0^{L_0} + a_0^{L_d} = a_1^{L_0} + a_1^{L_d} = 1$ ). At the beginning,  $L_0/L_d$  compositions in  $R_0$  and  $R_1$  are the same ( $a_0^{L_0} = a_1^{L_0}$ ,  $a_0^{L_d} = a_1^{L_d}$ ). After incubation,  $L_d$  phase is enriched in  $R_1$  and  $L_0$  phase is enriched in  $R_0$  ( $a_0^{L_0} > a_1^{L_0}$ ,  $a_0^{L_d} < a_1^{L_d}$ ).

### 3. FRAP measurement of the membrane after phase separation:

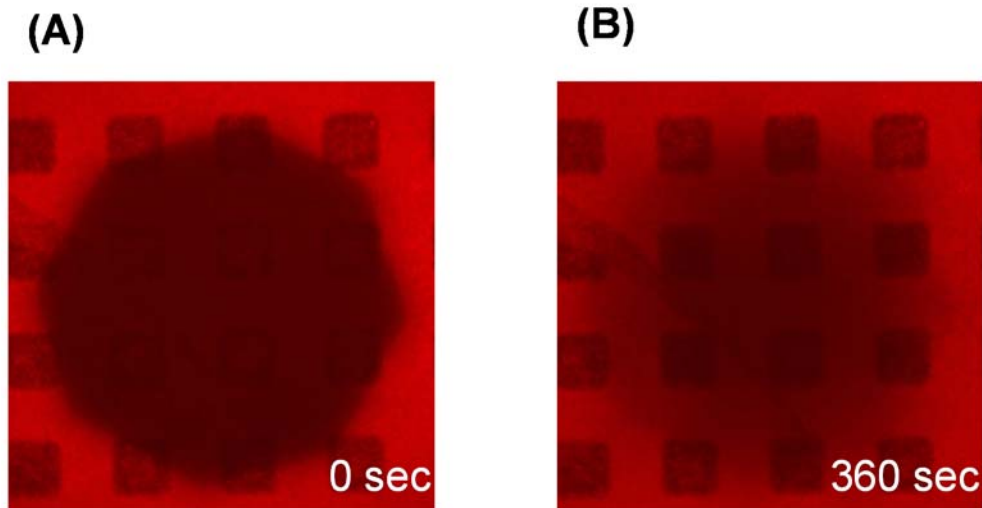

Figure S3: FRAP measurement of the bilayer after phase separation of DOPC/ SM/ Chol/ TR-PE/ GM1: TR-PE was photobleached and the fluorescence recovery with time was observed. The boundary of photobleached area became unclear with time, suggesting the lateral diffusion of lipid molecules in  $R_1$ . The size of corrals was 10  $\mu\text{m}$ .

#### 4. Line profiles of TR-PE and CTB-488 in the membrane:

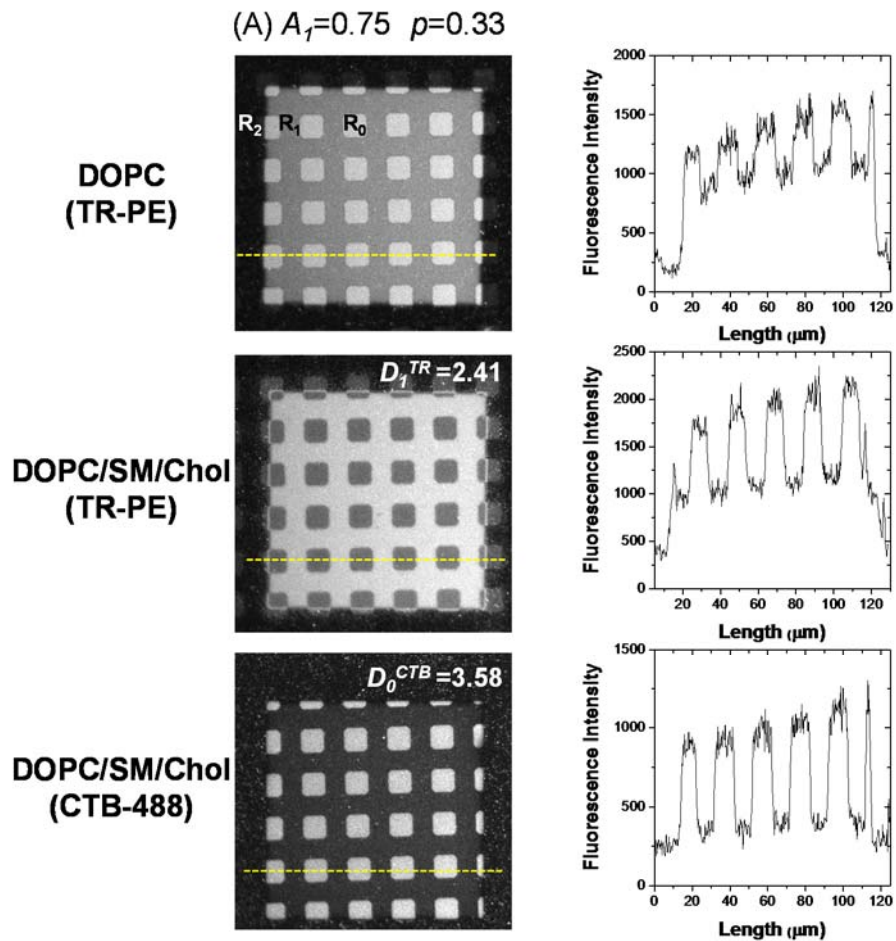

Figure S4: Fluorescence intensity profiles of TR-PE and CTB-488 after the phase separation of DOPC/ SM/ Chol/ TR-PE/  $G_{M1}$ : Micrographs of the patterned bilayer (left) and the intensity profiles (right). The micrographs are the same as Figure 2(A). The size of corrals was  $10 \mu\text{m}$ .

## 5. Model of the polymer-induced phase separation:

To account for the effect of polymeric bilayer on the phase separation, we formulated a model assuming random distribution of polymeric bilayer domains in  $R_1$  and accumulation of  $L_d$  domains around the polymeric domains. We hypothesize that a part of  $L_d$  phase is accumulated around polymeric bilayers (we call it bound  $L_d$  domains) and the rest of  $L_d$  phase (free  $L_d$  domains) is randomly mixed with  $L_o$  domains in  $R_0$  and  $R_1$  (Figure S5). We assume that the amount of bound  $L_d$  domains is proportional to the area fraction of polymeric bilayers in  $R_1$  ( $p$ ). (This assumption is valid if polymeric bilayer domains are uniform in size and the domains are not connected with each other.) The area fractions of  $L_o$  and  $L_d$  phases in the patterned membrane can be described by Eqs. (1)-(3) (Figure S2). The total area of the patterned membrane ( $R_0$  and  $R_1$ ) corresponds to unity. The parameter  $q$  represents the gross area fraction of  $L_o$  phase, which is determined by the lipid composition.

$$\text{Total area of fluid bilayer:} \quad A^{L_o} + A^{L_d} = 1 - A_1 p \quad (1)$$

$$\text{Total area of } L_o \text{ phase:} \quad A^{L_o} = (1 - A_1 p) q \quad (2)$$

$$\text{Total area of } L_d \text{ phase:} \quad A^{L_d} = (1 - A_1 p) (1 - q) \quad (3)$$

The amount of bound and free  $L_d$  domains in  $R_1$  can be expressed as follows.

$$\text{Bound } L_d \text{ domain (in } R_1\text{):} \quad A_b^{L_d} = r A_1 p \quad (4)$$

Free  $L_d$  domain (in  $R_0$  and  $R_1$ ):

$$A_f^{L_d} = 1 - A_1 p - A^{L_o} - r A_1 p = 1 - A_1 p(1 + r) - (1 - A_1 p) q \quad (5)$$

The character  $r$  represents the proportionality between the areas of bound  $L_d$  domains and the area of polymeric bilayer. The physical meaning of  $r$  is analogous to the coherence length around the lipid bilayer domains (i.e. the degree of ordering in mobile lipids at the boundaries),<sup>1</sup> although its length should be determined by the thickness mismatch at the boundary and bending elasticity of the fluid bilayer.

Since free  $L_d$  domains are randomly mixed with  $L_o$  domains, the area fraction of  $L_o$  and  $L_d$  phase in  $R_0$  can be determined by Eqns (6) and (7).  $a_0^{L_o}$  and  $a_0^{L_d}$  are area fractions of  $L_o$  and  $L_d$  phases *within*  $R_0$  ( $a_0^{L_o} + a_0^{L_d} = 1$ ) (It should be noted that  $a_0^{L_o}$  and  $a_0^{L_d}$  have a different definition compared with  $A^{L_o}$  and  $A^{L_d}$ ).

$$\text{Area fraction of } L_o \text{ in } R_0: \quad a_0^{L_o} = \frac{A^{L_o}}{A^{L_o} + A_f^{L_d}} = \frac{(1-A_1p)q}{1-A_1p-rA_1p} \quad (6)$$

$$\text{Area fraction of } L_d \text{ in } R_0: \quad a_0^{L_d} = 1 - a_0^{L_o} = \frac{1-A_1p-rA_1p-q+A_1pq}{1-A_1p-rA_1p} \quad (7)$$

The area fractions of  $L_o$  phase in  $R_1$  can be calculated by subtracting the area fraction of  $L_o$  domains in  $R_0$  ( $1 - A_1$ ) $a_0^{L_o}$  from the gross  $L_o$  area fraction,  $A^{L_o}$ .

Area fraction of  $L_o$  in  $R_1$ :

$$a_1^{L_o} = \frac{A^{L_o} - (1-A_1)a_0^{L_o}}{A_1(1-p)} = \frac{(1-A_1p)q - (1-A_1)\frac{(1-A_1p)q}{1-A_1p-rA_1p}}{A_1(1-p)} = \frac{(1-A_1p)(1-p-rp)q}{(1-p)(1-A_1p-rA_1p)} \quad (8)$$

This leads to the area fraction of  $L_d$  in  $R_1$ :

$$a_1^{L_d} = 1 - a_1^{L_o} = \frac{(1-p)(1-A_1p-rA_1p-q+A_1pq) + (1-A_1p)rpq}{(1-p)(1-A_1p-rA_1p)} \quad (9)$$

Therefore, the enrichment of  $L_d$  phases in  $R_1$  compared  $R_0$  is expressed with the following equation:

$$\begin{aligned} \frac{a_1^{L_d}}{a_0^{L_d}} &= \frac{(1-p)(1-A_1p-rA_1p-q+A_1pq)+(1-A_1p)rpq}{(1-p)(1-A_1p-rA_1p)} \times \frac{1-A_1p-rA_1p}{1-A_1p-rA_1p-q+A_1pq} \\ &= 1 + \frac{(1-A_1pq)rpq}{(1-p)(1-A_1p-rA_1p-q+A_1pq)} \end{aligned} \quad (10)$$

We fitted Eq. 10 to the experimental results in Figure 3(A) by varying the  $r$  value. Figure S6 shows the fitting results. The fitted  $r$  values were 0.27 and 0.14 for  $A_l = 0.75$  and 0.95, respectively. In the case of  $A_l = 0.95$ , we also show the simulation result with  $r = 0.27$ . Although the fitting result was rather poor due to the strong influence from the data points near the limit at infinity, the model qualitatively reproduces the experimentally observed dependency of  $D_l^{L_d}$  on  $p$ . The model underestimates  $D_l^{L_d}$  for small  $p$  values. The discrepancy between the model and experimental results could stem from several factors such as Ostwald ripening of domains in  $R_0$ . The model does not take into account the spontaneous growth of  $L_0$  domains. In the partially polymerized region ( $R_1$ ) the growth of domain size is hindered by the polymeric bilayer domains (obstacles). As a result,  $L_0$  domains may preferentially expand in the polymer-free region ( $R_0$ ). Another factor is the area fraction of bound  $L_d$  domains ( $A_b^{L_d}$ ), which may not proportionally increase with the area fraction of the polymeric bilayer ( $p$ ) for higher values of  $p$ . As the number of polymeric bilayer domains increases, the total length of polymeric bilayer boundary may become smaller with respect to the occupied area due to the overlap and connection of the domains. It should result in decreased accumulation of  $L_d$  domains in  $R_1$ . In spite of these limitations, the agreement of the model with the experimental results underlines the



important role played by the polymeric bilayer domains.

### Side view

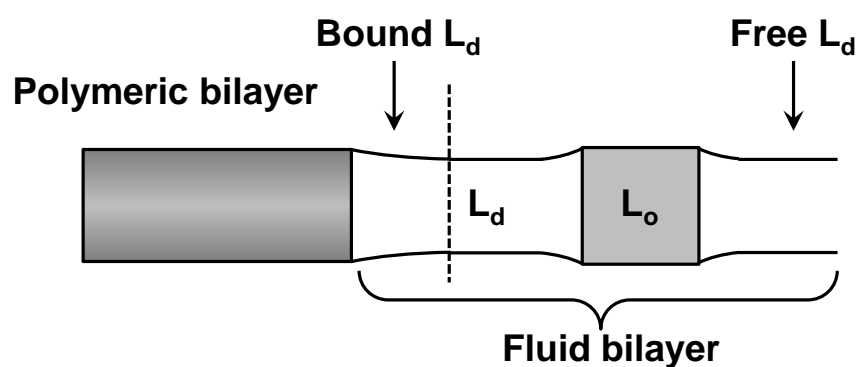

### Top view

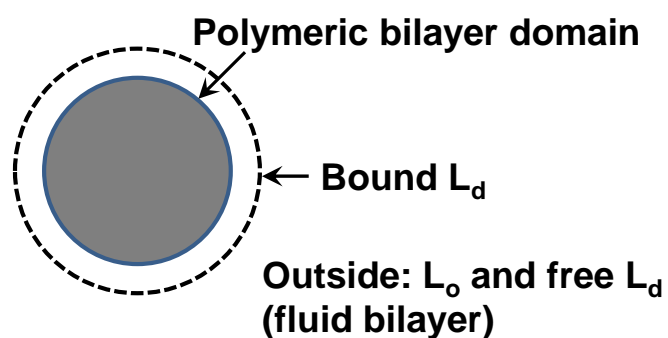

Figure S5: Schematic illustration of the polymer-induced phase separation. Due to the finite thickness mismatch at the polymer-fluid bilayer junction, the fluid bilayer is expected to be deformed. We hypothesized that  $L_d$  domains preferentially accumulated around a polymeric bilayer domain because of their lower bending moduli, and formed a circular region of bound  $L_d$  domains.

(A)

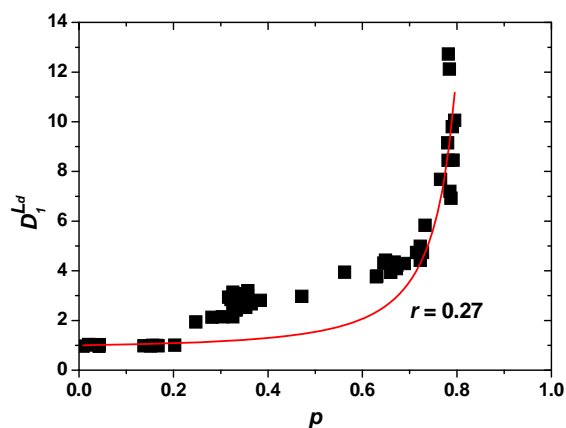

(B)

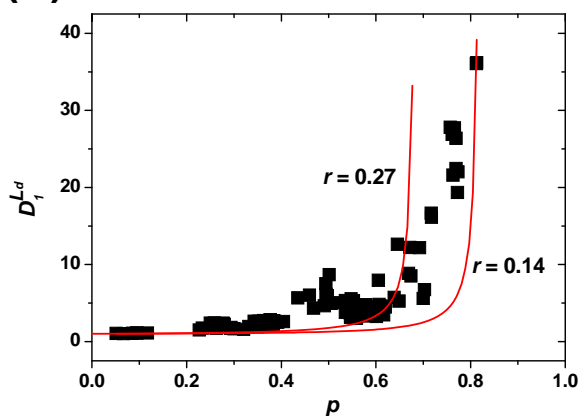

Figure S6: Enrichment of L<sub>d</sub> phase in R<sub>1</sub> ( $D_1^{L_d}$ ) in samples with varied polymeric bilayer fractions in R<sub>1</sub> ( $p$ ). The experimental results (black dots) and the model (red lines) were compared. (A)  $A_I = 0.75$ ; (B)  $A_I = 0.95$ . The  $r$  values (proportionality between the amount of bound L<sub>d</sub> domains and polymer) were fitted and compared with the experimental results.

## Reference

- (1) Almeida, P. F. F.; Vaz, W. L. C.; Thompson, T. E. Lateral diffusion and percolation in 2-phase, 2-component lipid bilayers - topology of the solid-phase domains inplane and across the lipid bilayer. *Biochemistry* 1992, *31*, 7198-7210.
